# Supplementary material for: Bidirectional temporal relationship between obesity and hyperinsulinemia: longitudinal observation from a Chinese cohort
Source: HighWire-hosted journal article supplement (doi:10.1136/bmjdrc-2020-002059), 2021-02-01
Supplement: bmjdrc-2020-002059supp001_data_supplement.pdf [file bmjdrc-2020-002059supp001_data_supplement.pdf]

## SUPPLEMENTAL MATERIALS

### **Bidirectional Temporal Relationship between Obesity and Hyperinsulinemia:**

#### **Longitudinal Observation from a Chinese Cohort**

Chao Xu<sup>1,2,3\*</sup>, Guangshuai Zhou<sup>4,5\*</sup>, Meng Zhao<sup>1,2,3</sup>, Xu Zhang<sup>1,2,3</sup>, Li Fang<sup>1,2,3</sup>, Qingbo Guan<sup>1,2,3</sup>, Haiqing Zhang<sup>1,2,3</sup>, Ling Gao<sup>2,3,6</sup>, Tao Zhang<sup>4#</sup>, Jiajun Zhao<sup>1,2,3#</sup>

<sup>1</sup> Department of Endocrinology and Metabolism, Shandong Provincial Hospital, Cheeloo College of Medicine, Shandong University, Jinan, Shandong, 250021, China;

<sup>2</sup> Institute of Endocrinology, Shandong Academy of Clinical Medicine, Jinan 250021, Shandong, China;

<sup>3</sup> Shandong Clinical Medical Center of Endocrinology and Metabolism, Jinan 250021, Shandong, China;

<sup>4</sup> Department of Biostatistics, School of Public Health, Cheeloo College of Medicine, Shandong University, 250012, Jinan, Shandong, China;

<sup>5</sup> Department of Quality Management Office, Zibo Central Hospital, Zibo 255036, Shandong, China

<sup>6</sup> Scientific Center, Shandong Provincial Hospital, Cheeloo College of Medicine, Shandong University, Jinan, Shandong, 250021, China.

**Running Title:** Temporal Sequence between Obesity and insulin

The authors do not have any conflict of interest.

\* These authors contributed equally.

#### **#Correspondence & Reprints:**

Jiajun Zhao, MD, PhD. Department of Endocrinology, Shandong Provincial Hospital affiliated to Shandong University, Jinan, Shandong, China.

Email: [jjzhao@medmail.com.cn](mailto:jjzhao@medmail.com.cn)

Tao Zhang, MD, PhD, Department of Biostatistics, School of Public Health, Cheeloo College of Medicine, Shandong University. PO Box 100, 44 Wenhuxi Road, Jinan, 250012, China.

Email: [taozhang@sdu.edu.cn](mailto:taozhang@sdu.edu.cn)

**Supplement Table S1. Pearson Correlation Coefficients Between BMI and Insulin , HOMA-IR or HOMA-%β\*.**

| Variable                 | Baseline | Baseline | Baseline | Baseline | Follow-up | Follow-up | Follow-up |
|--------------------------|----------|----------|----------|----------|-----------|-----------|-----------|
|                          | BMI      | Insulin  | HOMA-IR  | HOMA-%β  | BMI       | Insulin   | HOMA-IR   |
| <b>Baseline Insulin</b>  | 0.444    | ...      | ...      | ...      | ...       | ...       | ...       |
| <b>Baseline HOMA-IR</b>  | 0.441    | 0.998    | ...      | ...      | ...       | ...       | ...       |
| <b>Baseline HOMA-%β</b>  | 0.391    | 0.828    | 0.790    | ...      | ...       | ...       | ...       |
| <b>Follow-up BMI</b>     | 0.770    | 0.401    | 0.399    | 0.341    | ...       | ...       | ...       |
| <b>Follow-up Insulin</b> | 0.424    | 0.572    | 0.570    | 0.482    | 0.485     | ...       | ...       |
| <b>Follow-up HOMA-IR</b> | 0.424    | 0.567    | 0.567    | 0.462    | 0.483     | 0.998     | ...       |
| <b>Follow-up HOMA-%β</b> | 0.337    | 0.503    | 0.485    | 0.568    | 0.411     | 0.831     | 0.794     |

BMI indicates body mass index. Insulin HOMA-IR and HOMA-%β were log-transformed for normal distribution.

\*Adjusted for age, sex, smoking, drinking and follow-up years. Correlation coefficients >0.065 are significant ( $P<0.05$ ).

**Supplement Table S2. Pearson Correlation Coefficients Between WC and Insulin, HOMA-IR or HOMA-% $\beta$ .**

| Variable                                  | Baseline<br>WC | Baseline<br>Insulin | Baseline<br>HOMA-IR | Baseline<br>HOMA-% $\beta$ | Follow-up<br>WC | Follow-up<br>Insulin | Follow-up<br>HOMA-IR |
|-------------------------------------------|----------------|---------------------|---------------------|----------------------------|-----------------|----------------------|----------------------|
| <b>Baseline Insulin</b>                   | 0.389          | ...                 | ...                 | ...                        | ...             | ...                  | ...                  |
| <b>Baseline HOMA-IR</b>                   | 0.388          | 0.998               | ...                 | ...                        | ...             | ...                  | ...                  |
| <b>Baseline HOMA-%<math>\beta</math></b>  | 0.325          | 0.828               | 0.790               | ...                        | ...             | ...                  | ...                  |
| <b>Follow-up WC</b>                       | 0.507          | 0.368               | 0.365               | 0.324                      | ...             | ...                  | ...                  |
| <b>Follow-up Insulin</b>                  | 0.379          | 0.572               | 0.570               | 0.482                      | 0.417           | ...                  | ...                  |
| <b>Follow-up HOMA-IR</b>                  | 0.378          | 0.567               | 0.567               | 0.462                      | 0.418           | 0.998                | ...                  |
| <b>Follow-up HOMA-%<math>\beta</math></b> | 0.322          | 0.503               | 0.485               | 0.568                      | 0.324           | 0.831                | 0.794                |

WC indicates waist circumference. Insulin HOMA-IR and HOMA-% $\beta$  were log-transformed for normal distribution.

\*Adjusted for age, sex, smoking, drinking and follow-up years. Correlation coefficients >0.065 are significant ( $P<0.05$ ).

**Supplement Table S3. Pearson Correlation Coefficients Between HC and Insulin, HOMA-IR or HOMA-% $\beta$ \*.**

| Variable                                  | Baseline<br>HC | Baseline<br>Insulin | Baseline<br>HOMA-IR | Baseline<br>HOMA-% $\beta$ | Follow-up<br>HC | Follow-up<br>Insulin | Follow-up<br>HOMA-IR |
|-------------------------------------------|----------------|---------------------|---------------------|----------------------------|-----------------|----------------------|----------------------|
| <b>Baseline Insulin</b>                   | 0.314          | ...                 | ...                 | ...                        | ...             | ...                  | ...                  |
| <b>Baseline HOMA-IR</b>                   | 0.312          | 0.998               | ...                 | ...                        | ...             | ...                  | ...                  |
| <b>Baseline HOMA-%<math>\beta</math></b>  | 0.269          | 0.828               | 0.790               | ...                        | ...             | ...                  |                      |
| <b>Follow-up HC</b>                       | 0.448          | 0.333               | 0.330               | 0.292                      | ...             | ...                  | ...                  |
| <b>Follow-up Insulin</b>                  | 0.335          | 0.572               | 0.570               | 0.482                      | 0.400           | ...                  | ...                  |
| <b>Follow-up HOMA-IR</b>                  | 0.328          | 0.567               | 0.567               | 0.462                      | 0.399           | 0.998                | ...                  |
| <b>Follow-up HOMA-%<math>\beta</math></b> | 0.326          | 0.503               | 0.485               | 0.568                      | 0.328           | 0.831                | 0.794                |

HC indicates hip circumference. Insulin HOMA-IR and HOMA-% $\beta$  were log-transformed for normal distribution.

\*Adjusted for age, sex, smoking, drinking and follow-up years. Correlation coefficients >0.065 are significant ( $P<0.05$ ).

**Supplement Table S4. Pearson Correlation Coefficients Between WHR and Insulin , HOMA-IR or HOMA-% $\beta$ .**

| Variable                                  | Baseline | Baseline | Baseline | Baseline       | Follow-up | Follow-up | Follow-up |
|-------------------------------------------|----------|----------|----------|----------------|-----------|-----------|-----------|
|                                           | WHR      | Insulin  | HOMA-IR  | HOMA-% $\beta$ | WHR       | Insulin   | HOMA-IR   |
| <b>Baseline Insulin</b>                   | 0.195    | ...      | ...      | ...            | ...       | ...       | ...       |
| <b>Baseline HOMA-IR</b>                   | 0.196    | 0.998    | ...      | ...            | ...       | ...       | ...       |
| <b>Baseline HOMA-%<math>\beta</math></b>  | 0.152    | 0.828    | 0.790    | ...            | ...       | ...       | ...       |
| <b>Follow-up WHR</b>                      | 0.255    | 0.198    | 0.197    | 0.174          | ...       | ...       | ...       |
| <b>Follow-up Insulin</b>                  | 0.151    | 0.572    | 0.570    | 0.482          | 0.200     | ...       | ...       |
| <b>Follow-up HOMA-IR</b>                  | 0.157    | 0.567    | 0.567    | 0.462          | 0.202     | 0.998     | ...       |
| <b>Follow-up HOMA-%<math>\beta</math></b> | 0.068    | 0.503    | 0.485    | 0.568          | 0.138     | 0.831     | 0.794     |

WHR indicates waist-to-hip ratio. Insulin HOMA-IR and HOMA-% $\beta$  were log-transformed for normal distribution.

\*Adjusted for age, sex, smoking, drinking and follow-up years. Correlation coefficients >0.065 are significant ( $P<0.05$ ).

**Supplement Table S5. The cross-lagged path coefficients by sex, with adjustment for covariates.**

|                                       | Men (n=860) |           | Women (n=1633) |           | Sex difference         |                        |
|---------------------------------------|-------------|-----------|----------------|-----------|------------------------|------------------------|
|                                       | $\beta_1$   | $\beta_2$ | $\beta_1$      | $\beta_2$ | <i>P</i> for $\beta_1$ | <i>P</i> for $\beta_2$ |
| <b>BMI ↔ Insulin</b>                  | 0.072*      | 0.253*    | 0.075*         | 0.222*    | 0.943                  | 0.436                  |
| <b>WC ↔ Insulin</b>                   | 0.195*      | 0.233*    | 0.198*         | 0.159*    | 0.941                  | 0.068                  |
| <b>HC ↔ Insulin</b>                   | 0.232*      | 0.178*    | 0.194*         | 0.143*    | 0.345                  | 0.394                  |
| <b>WHR ↔ Insulin</b>                  | 0.167*      | 0.116*    | 0.148*         | 0.054*    | 0.644                  | 0.139                  |
| <b>BMI ↔ HOMA-IR</b>                  | 0.071*      | 0.254*    | 0.076*         | 0.225*    | 0.905                  | 0.466                  |
| <b>WC ↔ HOMA-IR</b>                   | 0.192*      | 0.231*    | 0.196*         | 0.161*    | 0.922                  | 0.084                  |
| <b>HC ↔ HOMA-IR</b>                   | 0.229*      | 0.176*    | 0.192*         | 0.142*    | 0.359                  | 0.408                  |
| <b>WHR ↔ HOMA-IR</b>                  | 0.166*      | 0.115*    | 0.146*         | 0.058*    | 0.627                  | 0.173                  |
| <b>BMI ↔ HOMA-%<math>\beta</math></b> | 0.062*      | 0.207*    | 0.045*         | 0.153*    | 0.686                  | 0.186                  |
| <b>WC ↔ HOMA-%<math>\beta</math></b>  | 0.180*      | 0.233*    | 0.174*         | 0.119*    | 0.883                  | 0.005                  |
| <b>HC ↔ HOMA-%<math>\beta</math></b>  | 0.215*      | 0.184*    | 0.166*         | 0.130*    | 0.228                  | 0.189                  |
| <b>WHR ↔ HOMA-%<math>\beta</math></b> | 0.140*      | 0.121*    | 0.139*         | 0.011     | 0.981                  | 0.009                  |

Covariates included age, smoking, drinking and follow-up years.

BMI indicates body mass index; WC, waist circumference; HC, hip circumference; WHR, waist to hip ratio; HOMA-IR, homeostasis model assessment of insulin resistance; HOMA-% $\beta$ , homeostasis model assessment of beta cell function. Insulin

HOMA-IR and HOMA-% $\beta$  were log-transformed for normal distribution.

$\beta_1$  describes the cross-lagged path coefficient from baseline Insulin, HOMA-IR or HOMA-% $\beta$  to follow-up BMI/WC/HC/WHR;  $\beta_2$

describes the cross-lagged path coefficient from baseline BMI/WC/HC/WHR to follow-up Insulin, HOMA-IR or HOMA-% $\beta$ .

\* $P < 0.05$  for  $\beta_1$  and  $\beta_2$  being different from 0.



**Supplement Table S6.** The cross-lagged path coefficients by excluding participants with pre-diabetes at baseline and follow-up

(N=1029)

| Obesity Measures | IR Measures    | Path coefficients (IR → Obesity) |              | Path coefficients (Obesity → IR) |             | P value† | RMR   | CFI   |
|------------------|----------------|----------------------------------|--------------|----------------------------------|-------------|----------|-------|-------|
|                  |                | $\beta_1$                        | 95% CI       | $\beta_2$                        | 95% CI      |          |       |       |
| BMI              | Insulin        | 0.057*                           | 0.014~0.101  | 0.225*                           | 0.171~0.279 | <0.001   | 0.018 | 0.99  |
| WC               | Insulin        | 0.176*                           | 0.118~0.233  | 0.203*                           | 0.150~0.255 | 0.526    | 0.010 | 0.992 |
| HC               | Insulin        | 0.184*                           | 0.127~0.242  | 0.163*                           | 0.111~0.214 | 0.624    | 0.012 | 0.95  |
| WHR              | Insulin        | 0.121*                           | 0.061~0.182  | 0.097*                           | 0.046~0.148 | 0.582    | 0.024 | 0.854 |
| BMI              | HOMA-IR        | 0.058*                           | 0.014~0.102  | 0.225*                           | 0.171~0.280 | <0.001   | 0.017 | 0.99  |
| WC               | HOMA-IR        | 0.171*                           | 0.113~0.228  | 0.200*                           | 0.147~0.253 | 0.496    | 0.009 | 0.993 |
| HC               | HOMA-IR        | 0.181*                           | 0.123~0.238  | 0.160*                           | 0.107~0.212 | 0.624    | 0.011 | 0.950 |
| WHR              | HOMA-IR        | 0.119*                           | 0.059~0.180  | 0.098*                           | 0.046~0.149 | 0.630    | 0.023 | 0.851 |
| BMI              | HOMA-% $\beta$ | 0.037                            | -0.006~0.079 | 0.194*                           | 0.142~0.245 | <0.001   | 0.024 | 0.988 |
| WC               | HOMA-% $\beta$ | 0.176*                           | 0.120~0.231  | 0.202*                           | 0.152~0.252 | 0.541    | 0.016 | 0.988 |
| HC               | HOMA-% $\beta$ | 0.174*                           | 0.117~0.230  | 0.174*                           | 0.125~0.224 | 1.000    | 0.017 | 0.947 |
| WHR              | HOMA-% $\beta$ | 0.113*                           | 0.053~0.173  | 0.089*                           | 0.040~0.139 | 0.583    | 0.033 | 0.852 |

Covariates included age, sex, smoking, drinking and follow-up years.

 $\beta_1$  describes the cross-lagged path coefficient from baseline HOMA-IR or HOMA-% $\beta$  to follow-up BMI/WC/HC/WHR;  $\beta_2$ describes the cross-lagged path coefficient from baseline BMI/WC/HC/WHR to follow-up HOMA-IR or HOMA-% $\beta$ .\* $P$ <0.05 for  $\beta_1$  and  $\beta_2$  being different from 0; † $P$  value for difference between  $\beta_1$  and  $\beta_2$ .

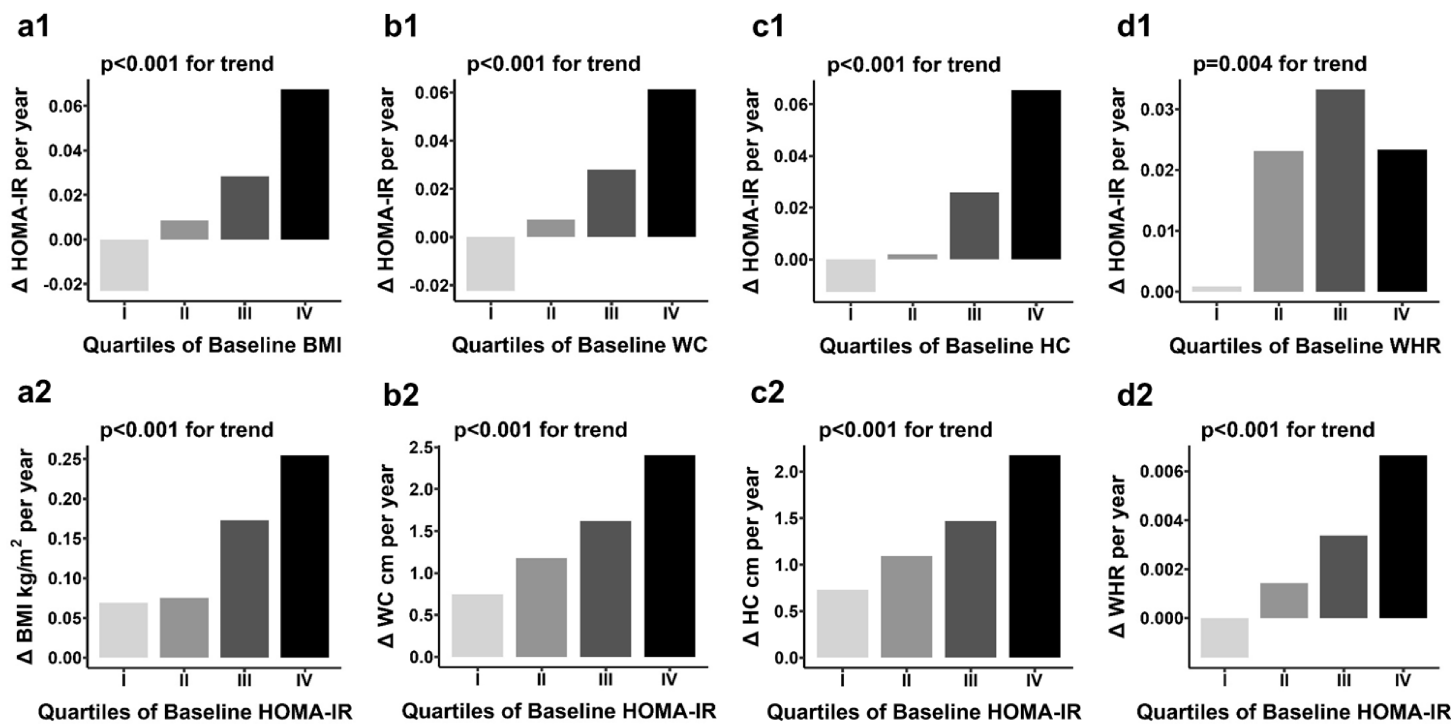

**Supplement Figure S1.** Yearly rates of change ( $\Delta$ ) of obesity measures and HOMA-IR by quartiles of their baseline values in the total sample, with adjustment of age, sex, smoking, drinking and their baseline values.

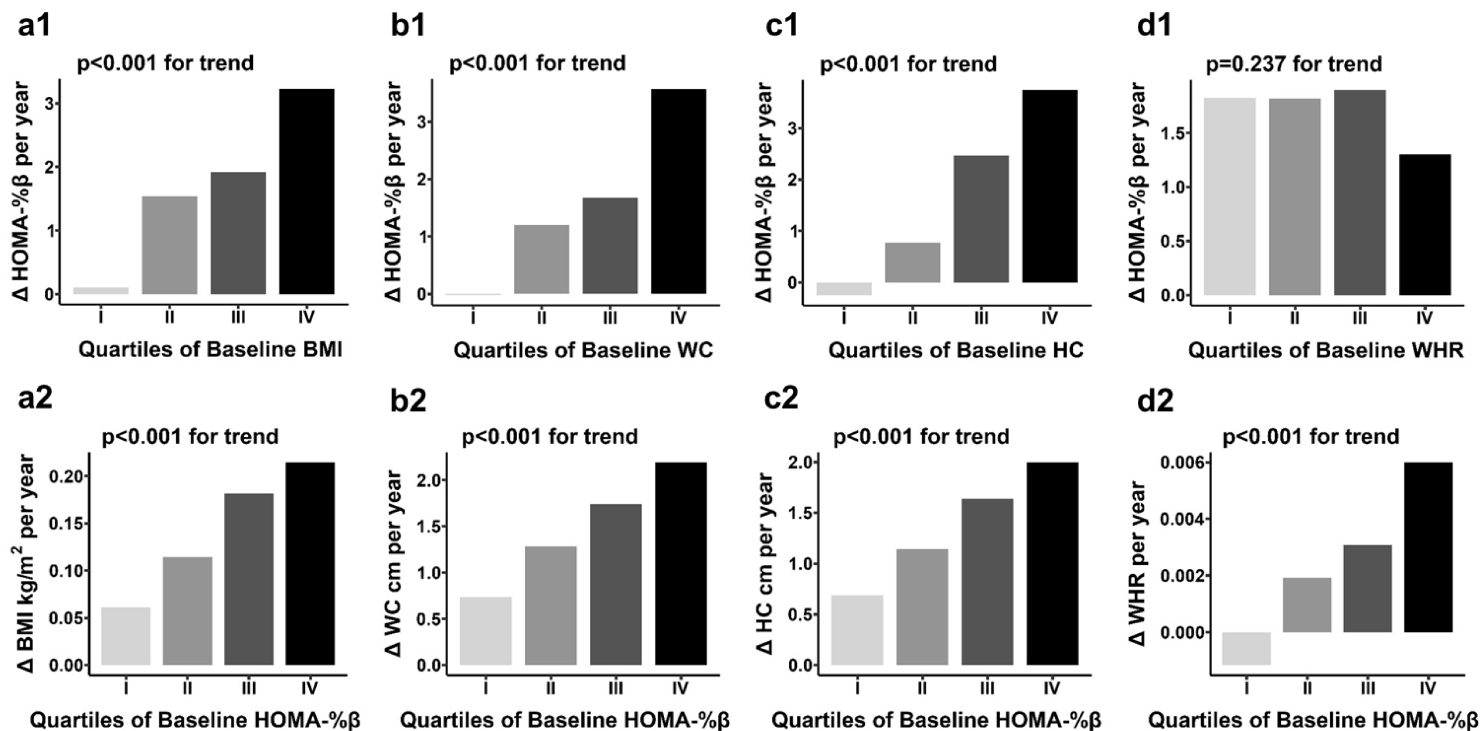

**Supplement Figure S2.** Yearly rates of change ( $\Delta$ ) of obesity measures and HOMA-% $\beta$  by quartiles of their baseline values in the total sample, with adjustment of age, sex, smoking, drinking and their baseline values.
